# Supplementary material for: Red-Shifted Environmental Fluorophores and Their Use for the Detection of Gram-Negative Bacteria
Source: MDPI journal article supplement (doi:10.3390/chemosensors9060117), 2021-05-21
Supplement: s1 [file s1]

Article

# Red-Shifted Environmental Fluorophores and Their Use for the Detection of Gram-Negative Bacteria

Alicia Megia-Fernandez <sup>1,\*</sup>, Maxime Klausen <sup>1</sup>, Bethany Mills <sup>2</sup>, Gillian E. Brown <sup>3</sup>, Heather McEwan <sup>1</sup>, Neil Finlayson <sup>3</sup>, Kevin Dhaliwal <sup>2</sup> and Mark Bradley <sup>1</sup>

<sup>1</sup> EaStCHEM School of Chemistry, University of Edinburgh, David Brewster Road, Edinburgh EH9 3FJ, UK; mklausen@ed.ac.uk (M.K.); H.McEwan-1@sms.ed.ac.uk (H.M.); Mark.Bradley@ed.ac.uk (M.B.)

<sup>2</sup> EPSRC Proteus IRC Hub, Centre for Inflammation Research, Queen's Medical Research Institute, University of Edinburgh, 47 Little France Crescent, Edinburgh EH16 4TJ, UK; Beth.Mills@ed.ac.uk (B.M.); Kev.Dhaliwal@ed.ac.uk (K.D.)

<sup>3</sup> Institute for Integrated Micro and Nano Systems, School of Engineering, University of Edinburgh, Edinburgh EH9 3FF, UK; g.e.brown@ed.ac.uk (G.E.B.); N.Finlayson@ed.ac.uk (N.F.)

\* Correspondence: A.Megia@ed.ac.uk

Supplementary Information

---

## CONTENT

1. Chemical characterization of compounds **1** and **2**
2. Photophysical characterization of compounds **1** and **2**

1. Chemical characterization of compounds **1** and **2**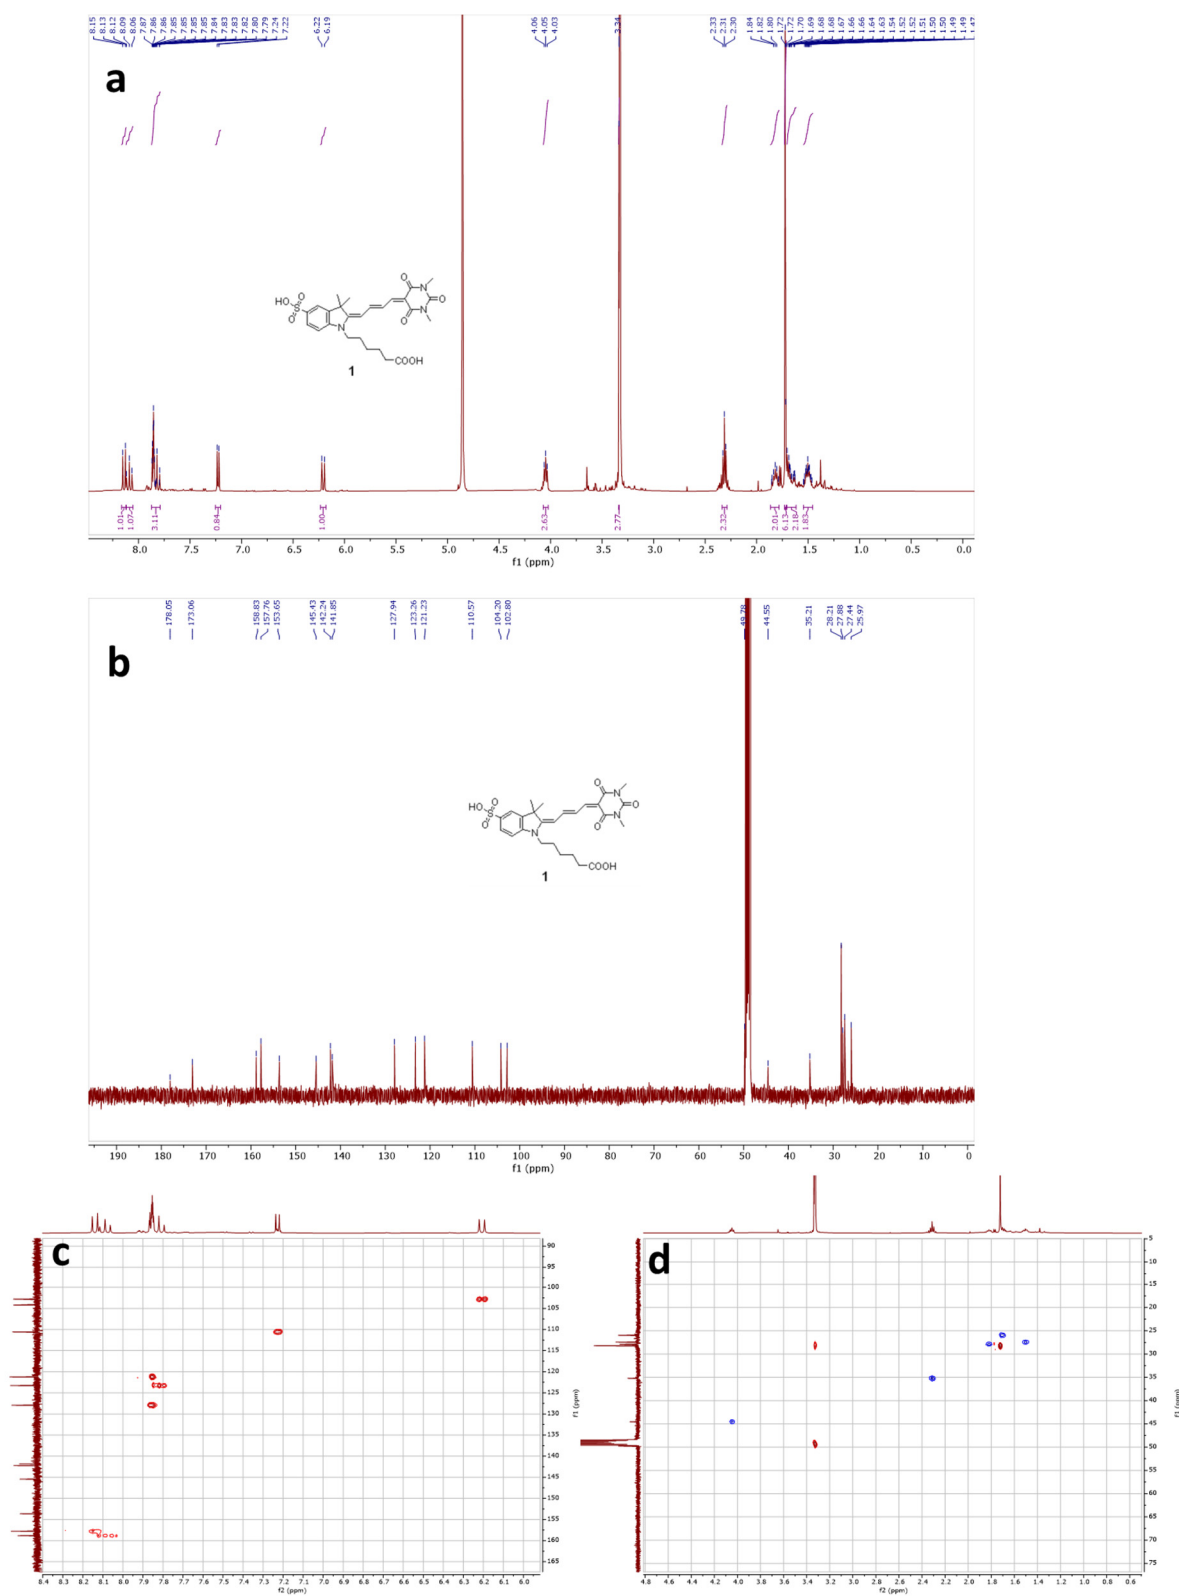

**Figure S1.** a)  $^1\text{H}$ -NMR spectrum of **1**; b)  $^{13}\text{C}$ -NMR spectrum of **1**; c) Multiplicity-edited HSQC 2D-NMR spectrum of **1**, zoom 8-6 ppm; d) Multiplicity-edited HSQC 2D-NMR spectrum of **1**, zoom 4-1 ppm.

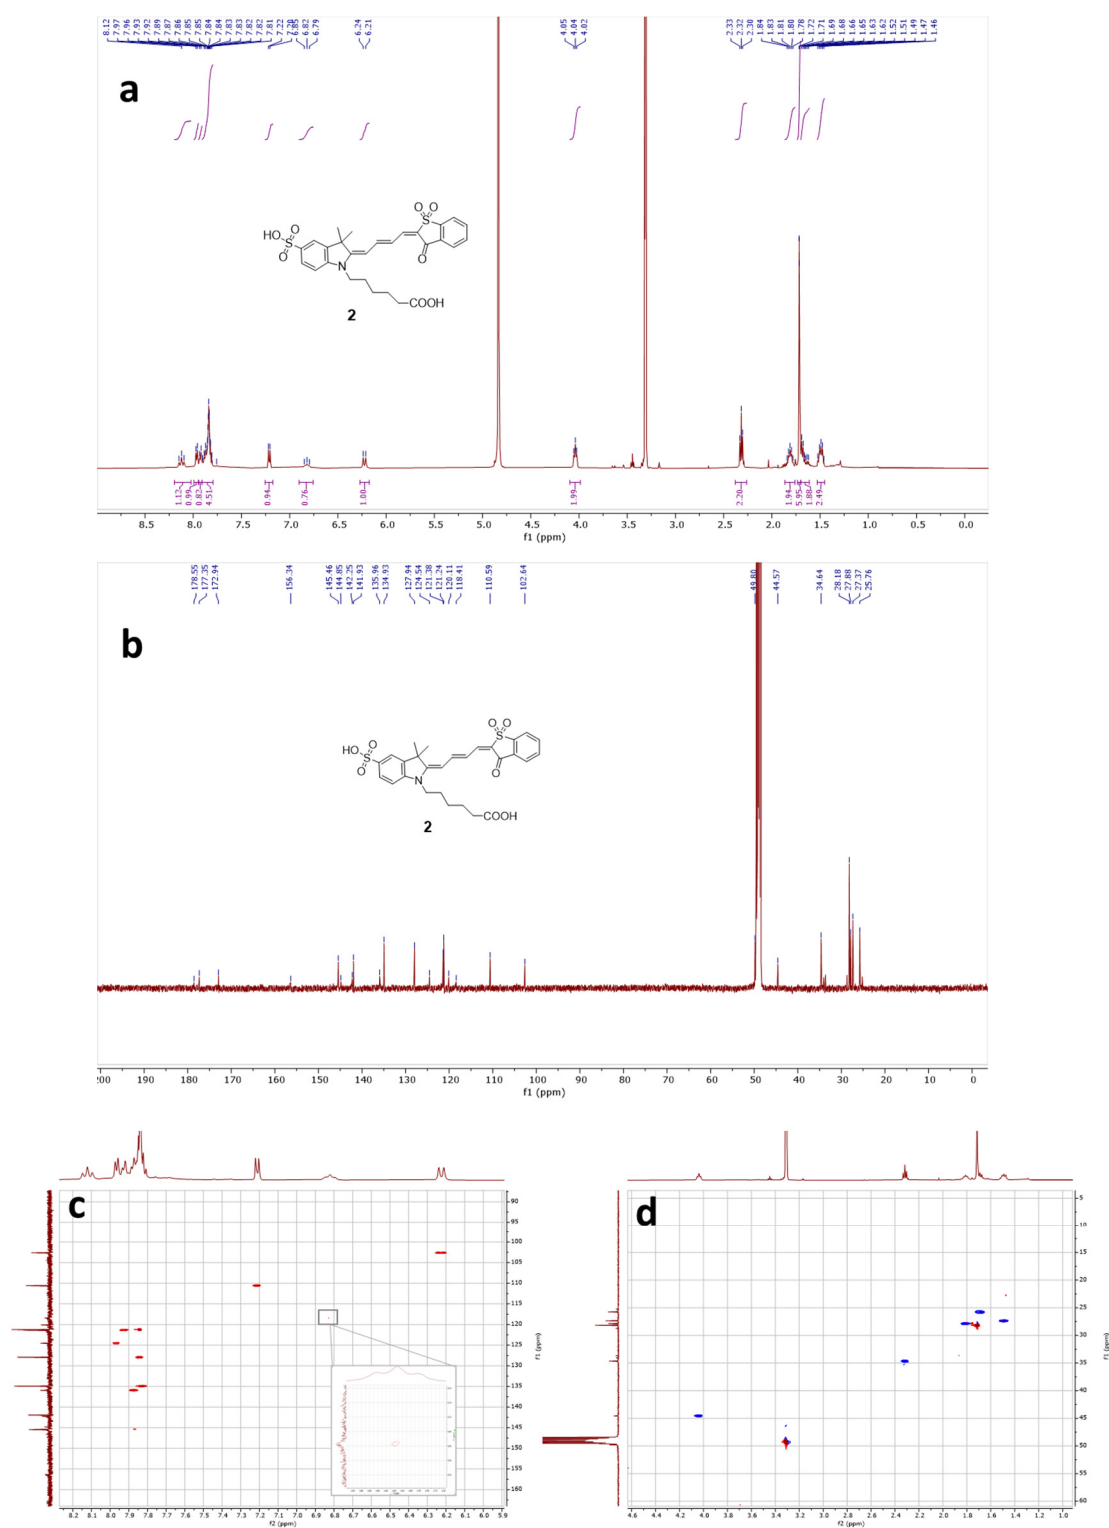

**Figure S2.** a)  $^1\text{H}$ -NMR spectrum of **2**; b)  $^{13}\text{C}$ -NMR spectrum of **2**; c) Multiplicity-edited HSQC 2D-NMR spectrum of **2**, zoom 8-6 ppm; d) Multiplicity-edited HSQC 2D-NMR spectrum of **2**, zoom 4-1 ppm.

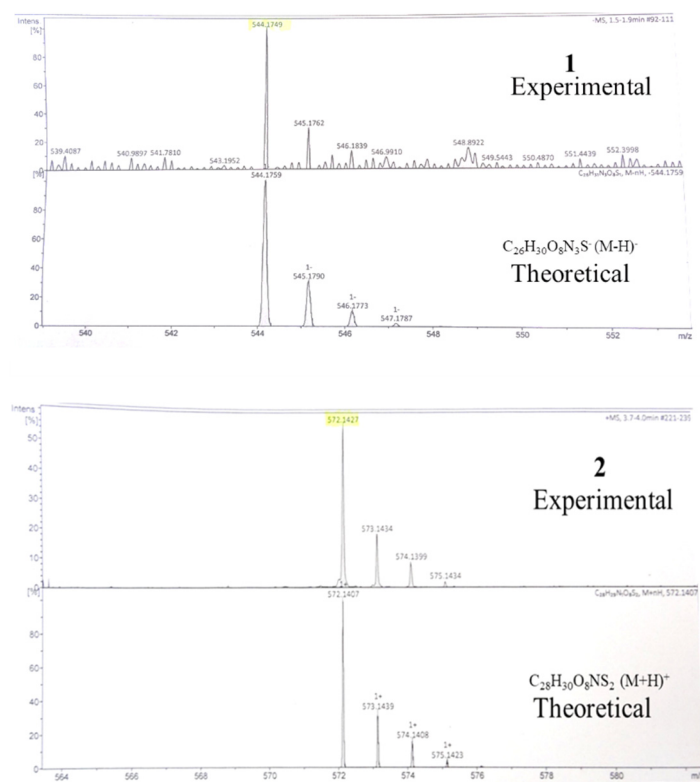

**Figure S3.** HR-MS spectrum of **1** (up) and **2** (down).

2. Photophysical characterization of compounds **1** and **2**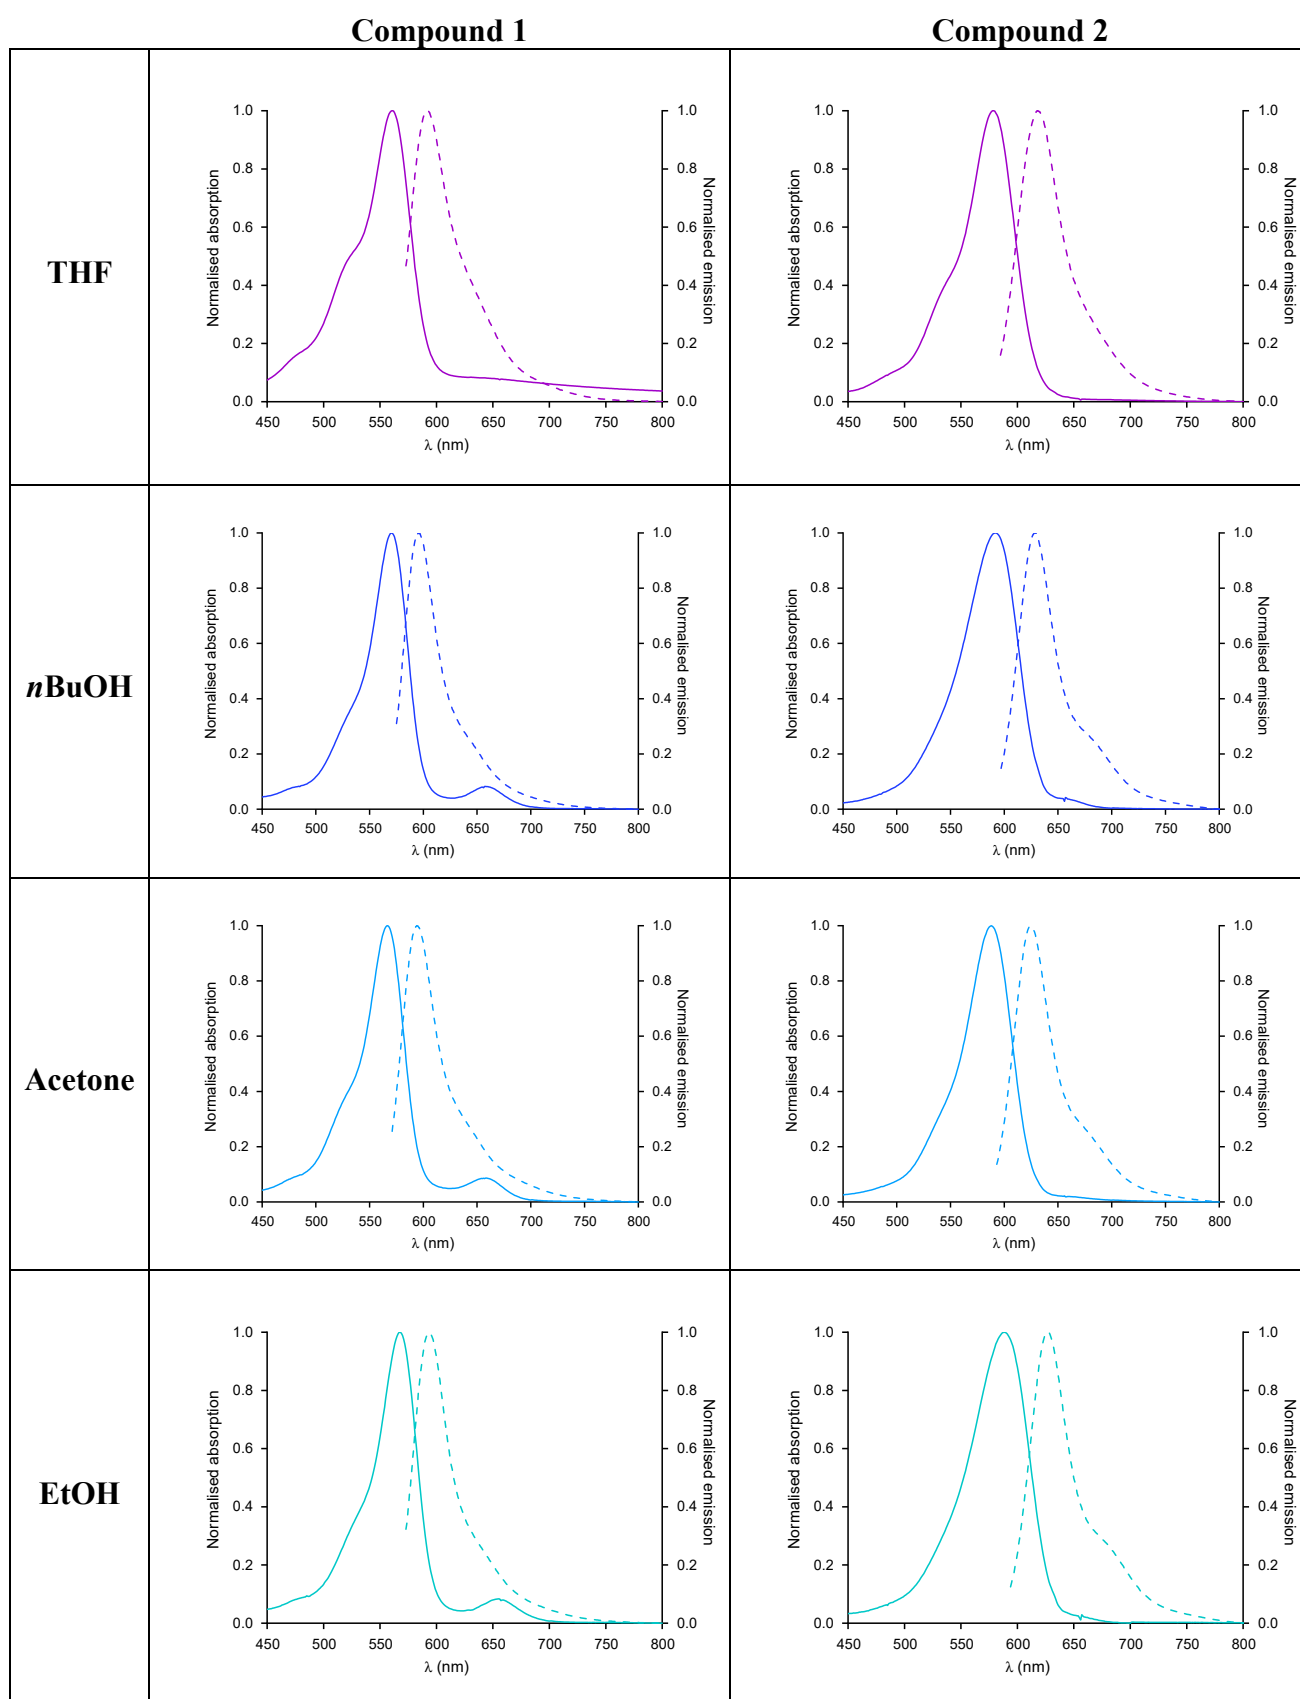**Figure S4.** Normalised absorption and emission spectra of **1** and **2** in different solvents.

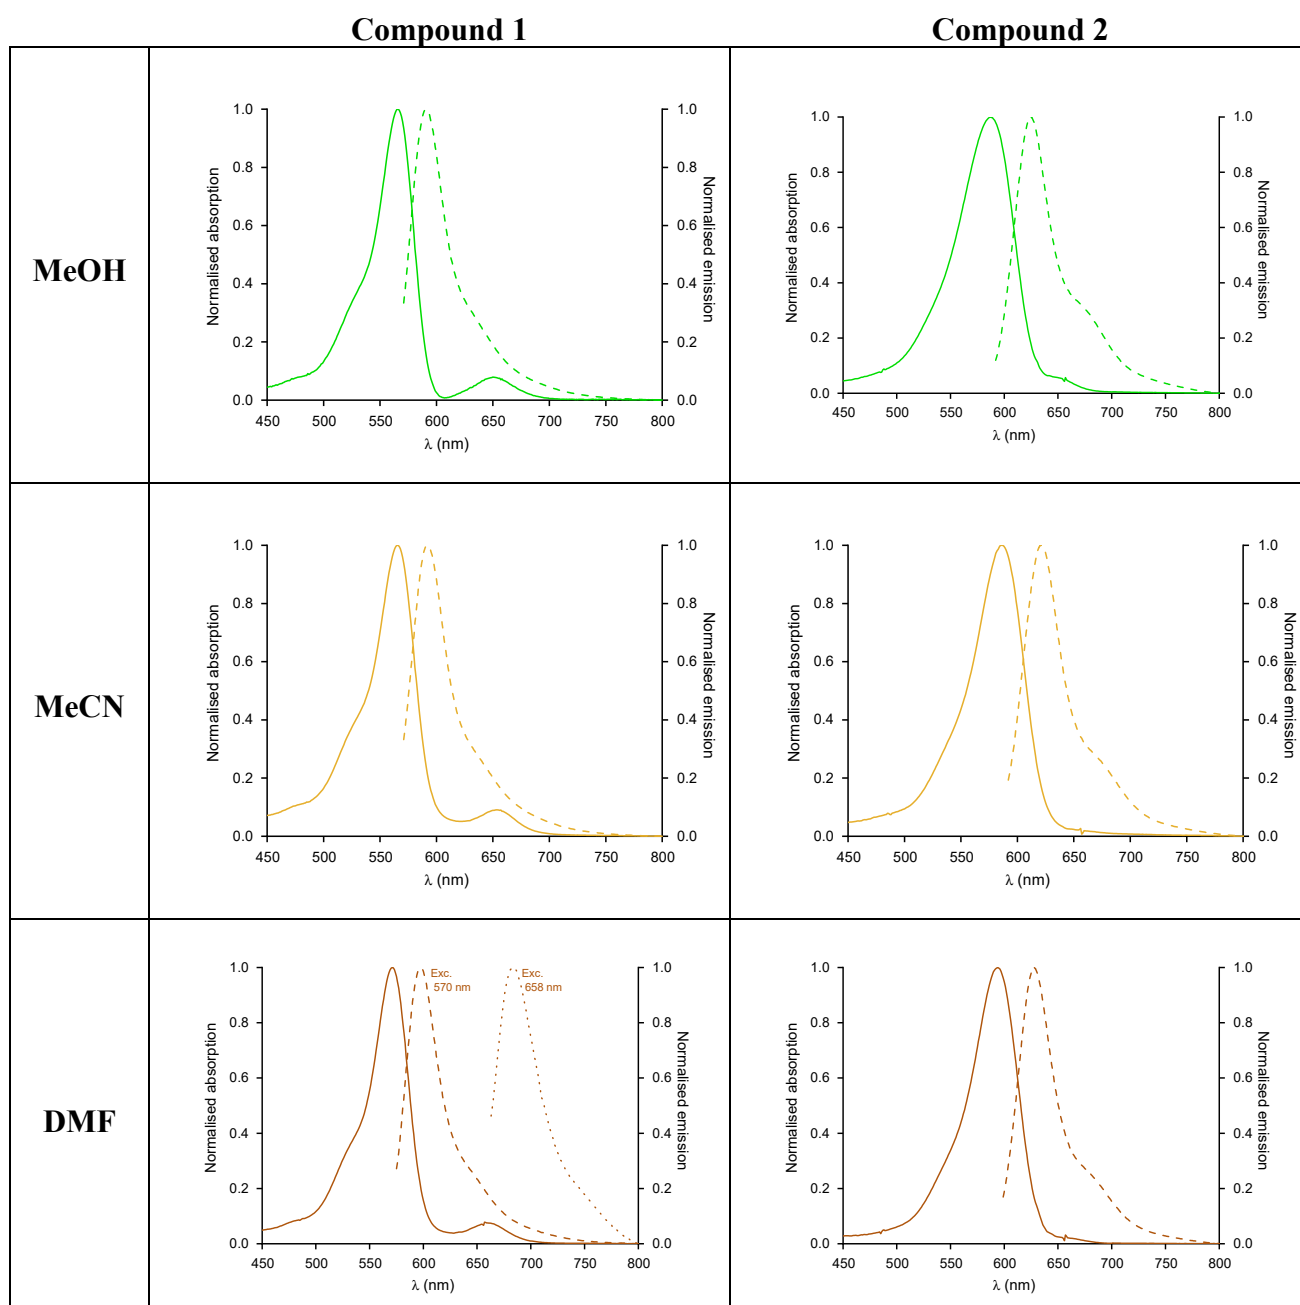

**Figure S4.** Normalised absorption and emission spectra of **1** and **2** in different solvents (continued).

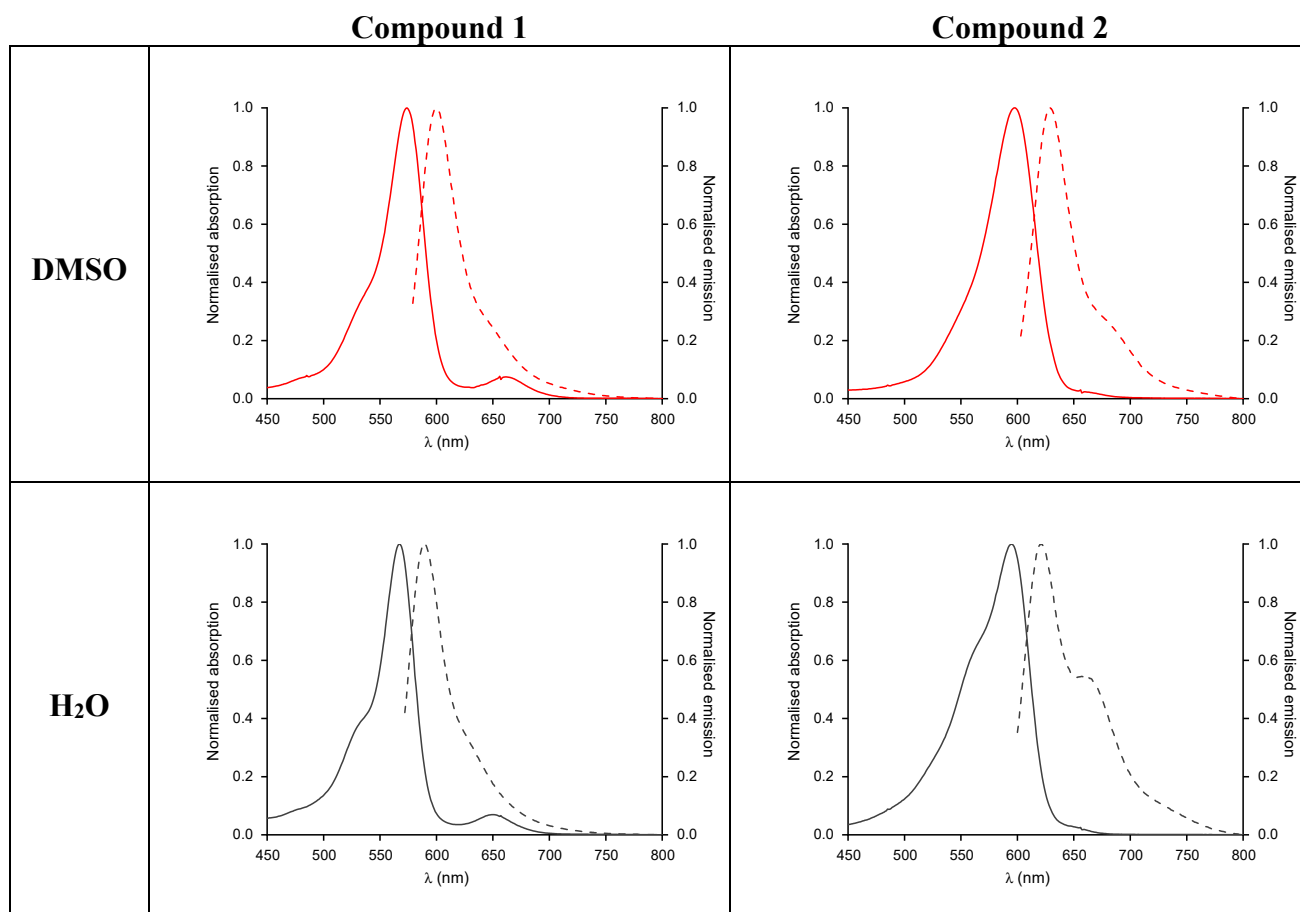

**Figure S4.** Normalised absorption and emission spectra of **1** and **2** in different solvents (continued).

### Solvent and environmental effect

The behaviour of the merocyanine sub-units was investigated in solvents of various polarities. Both fluorophores exhibited a complex behaviour in solution, and did not show a linear dependence of their Stoke's shift to the orientation-polarisability parameter as stated by the Lippert-Mataga equation [1,2]:

$$\nu_{abs} - \nu_{em} = 2\Delta\mu^2\Delta f / (hca^3) + \text{const}$$

where  $\nu_{abs}$  ( $\nu_{em}$ ) is the wavenumber of the absorption (fluorescence) maximum,  $\Delta\mu$  is the change of dipole moment between the relaxed emissive excited state and corresponding Frank Condon ground state,  $h$  is the Planck constant,  $c$  is the light velocity,  $a$  is the radius of the Onsager spherical cavity, and the orientation polarizability is  $\Delta f = (\epsilon - 1)/(2\epsilon + 1) - (n^2 - 1)/(2n^2 + 1)$ , where  $\epsilon$  is the dielectric constant and  $n$  the refractive index of the solvent.

Lippert-Mataga model applied to compound 1.

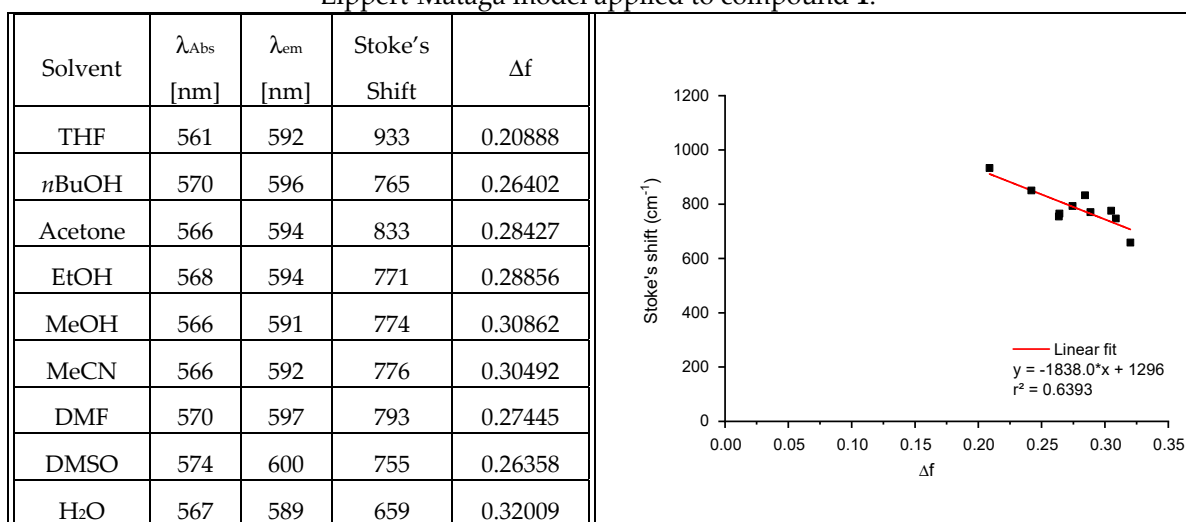

Lippert-Mataga model applied to compound 2.

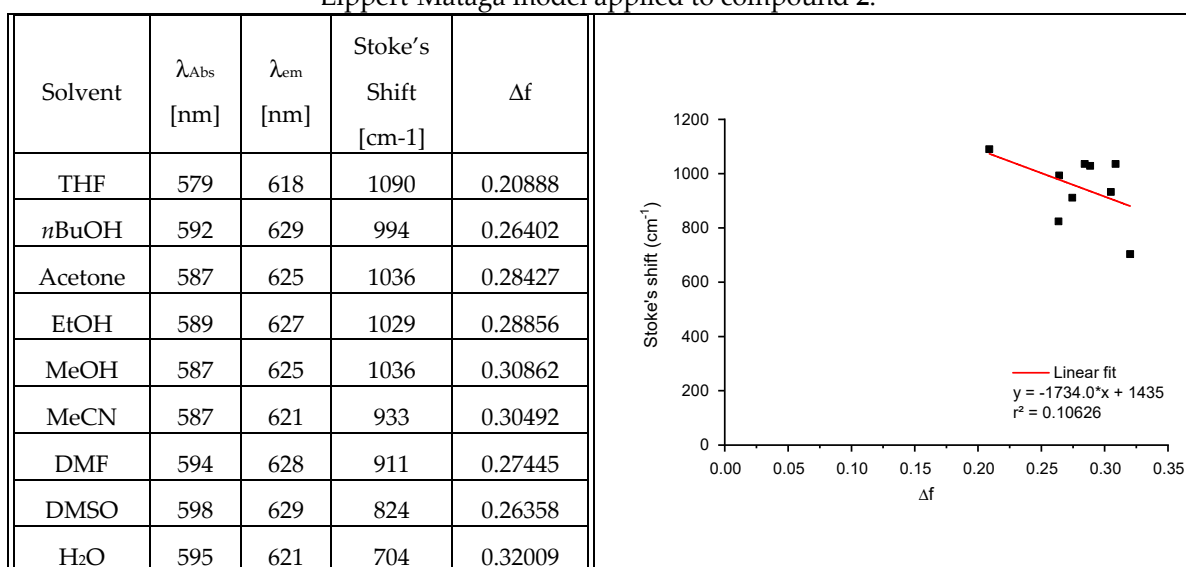



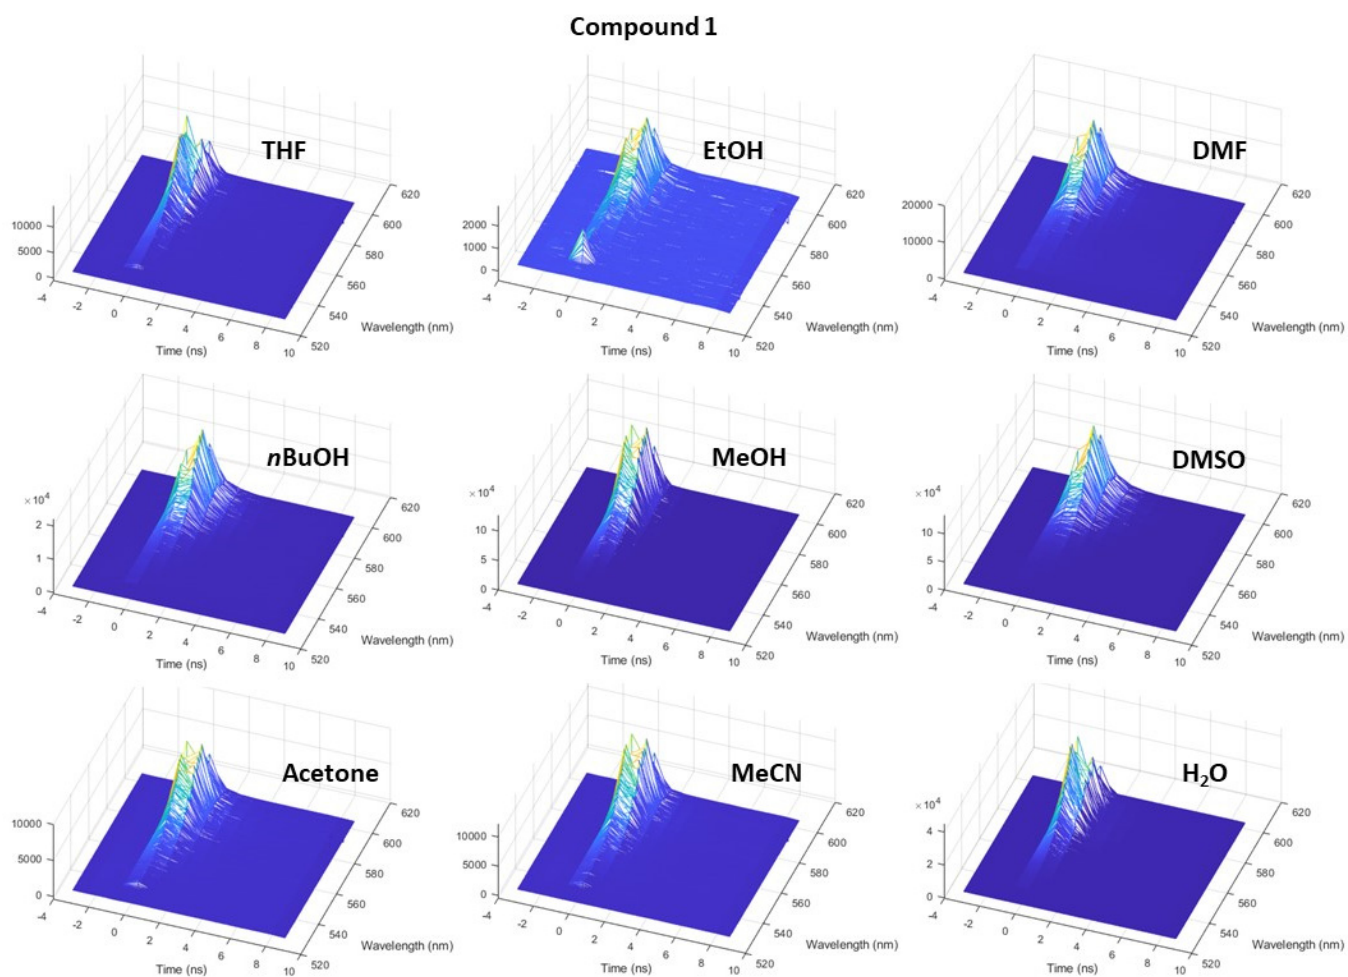

**Figure S5.** Time-resolved fluorescence spectra of compound **1** in different solvents.

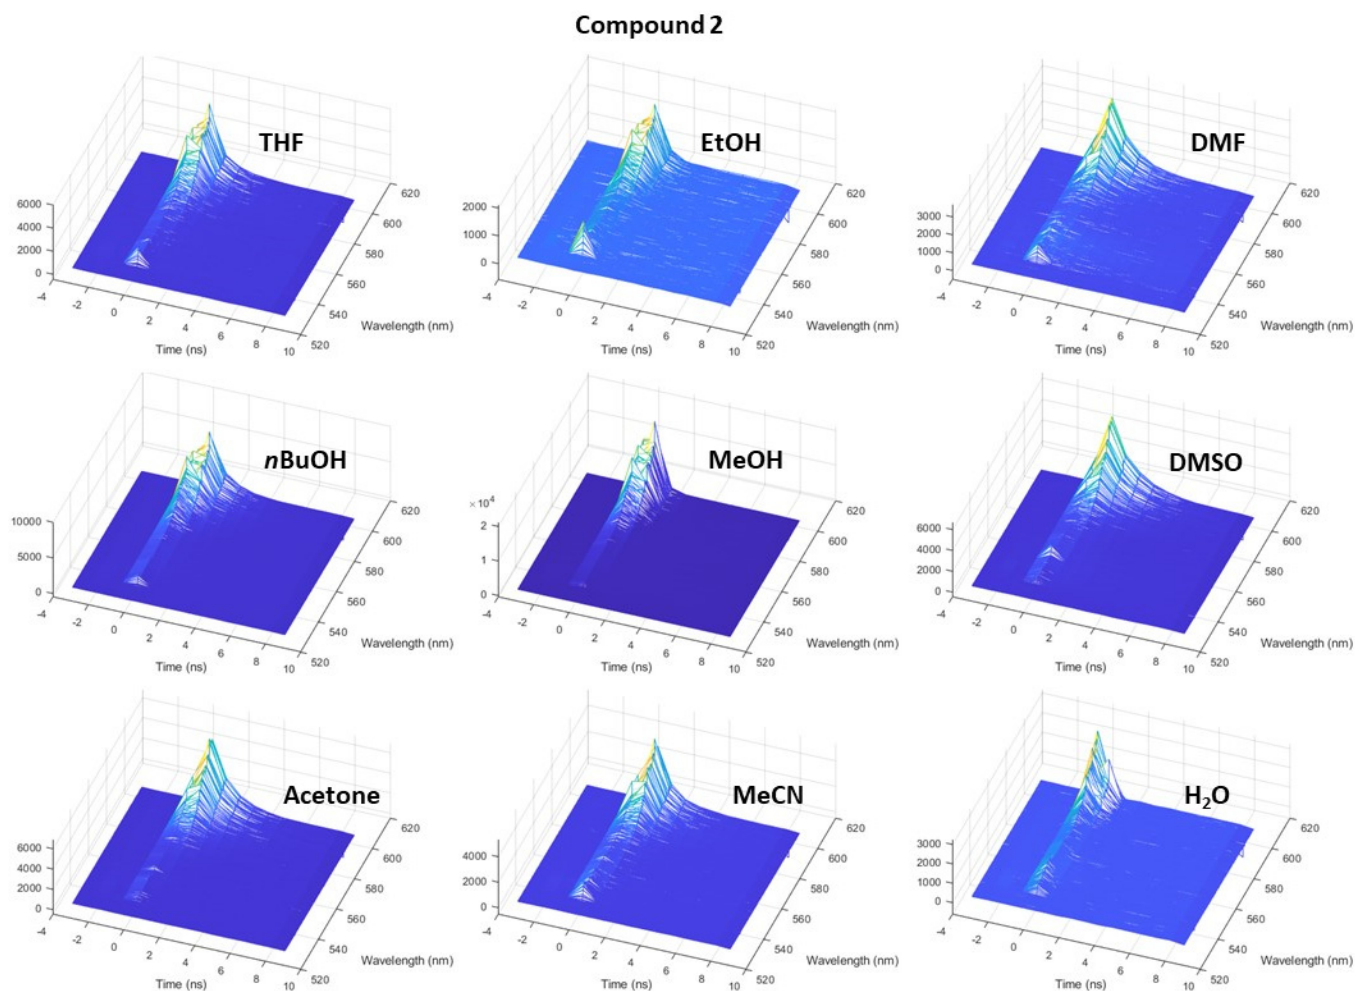

**Figure S6.** Time-resolved fluorescence spectra of compound **2** in different solvents.

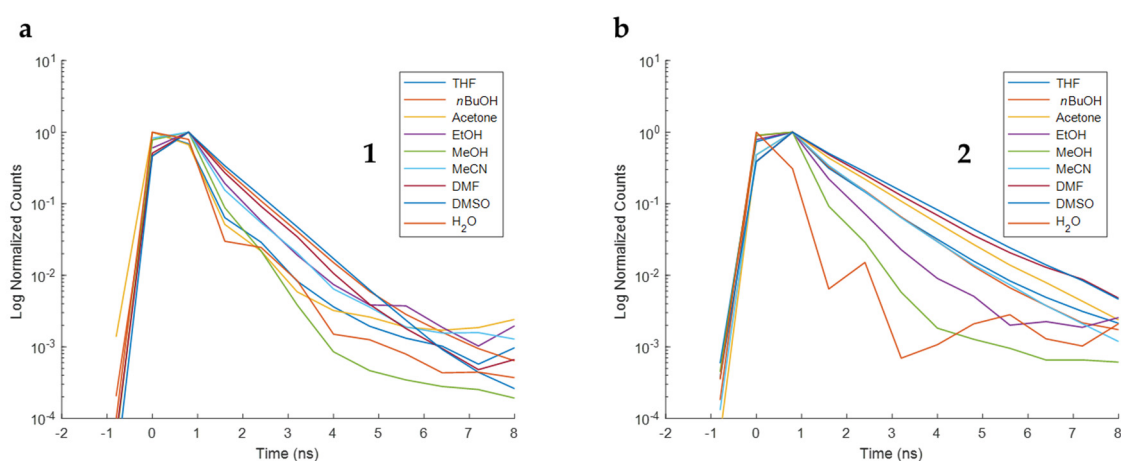

**Figure S7.** Time-resolved fluorescence decay curves for compounds (a) **1** and (b) **2** in all solvents. The logarithm of normalized counts vs time over a nine nanosecond time range with 800 ps time resolution. Fluorescence counts were summed and normalised over a 586–603 nm wavelength range.

## References

1. Lippert, E. Dipolmoment und Elektronenstruktur von angeregten Molekülen. *Zeitschrift für Naturforschung A* **1955**, *10*, 541–545, doi:<https://doi.org/10.1515/zna-1955-0707>.

2. Mataga, N.; Kaifu, Y.; Koizumi, M. The Solvent Effect on Fluorescence Spectrum, Change of Solute-Solvent Interaction during the Lifetime of Excited Solute Molecule. *Bulletin of the Chemical Society of Japan* **1955**, 28, 690–691.
